# Supplementary material
Source: PubMed Central journal article supplement (PMC8338884)
Supplement: NIHMS1690337-supplement-1.pdf [file NIHMS1690337-supplement-1.pdf]

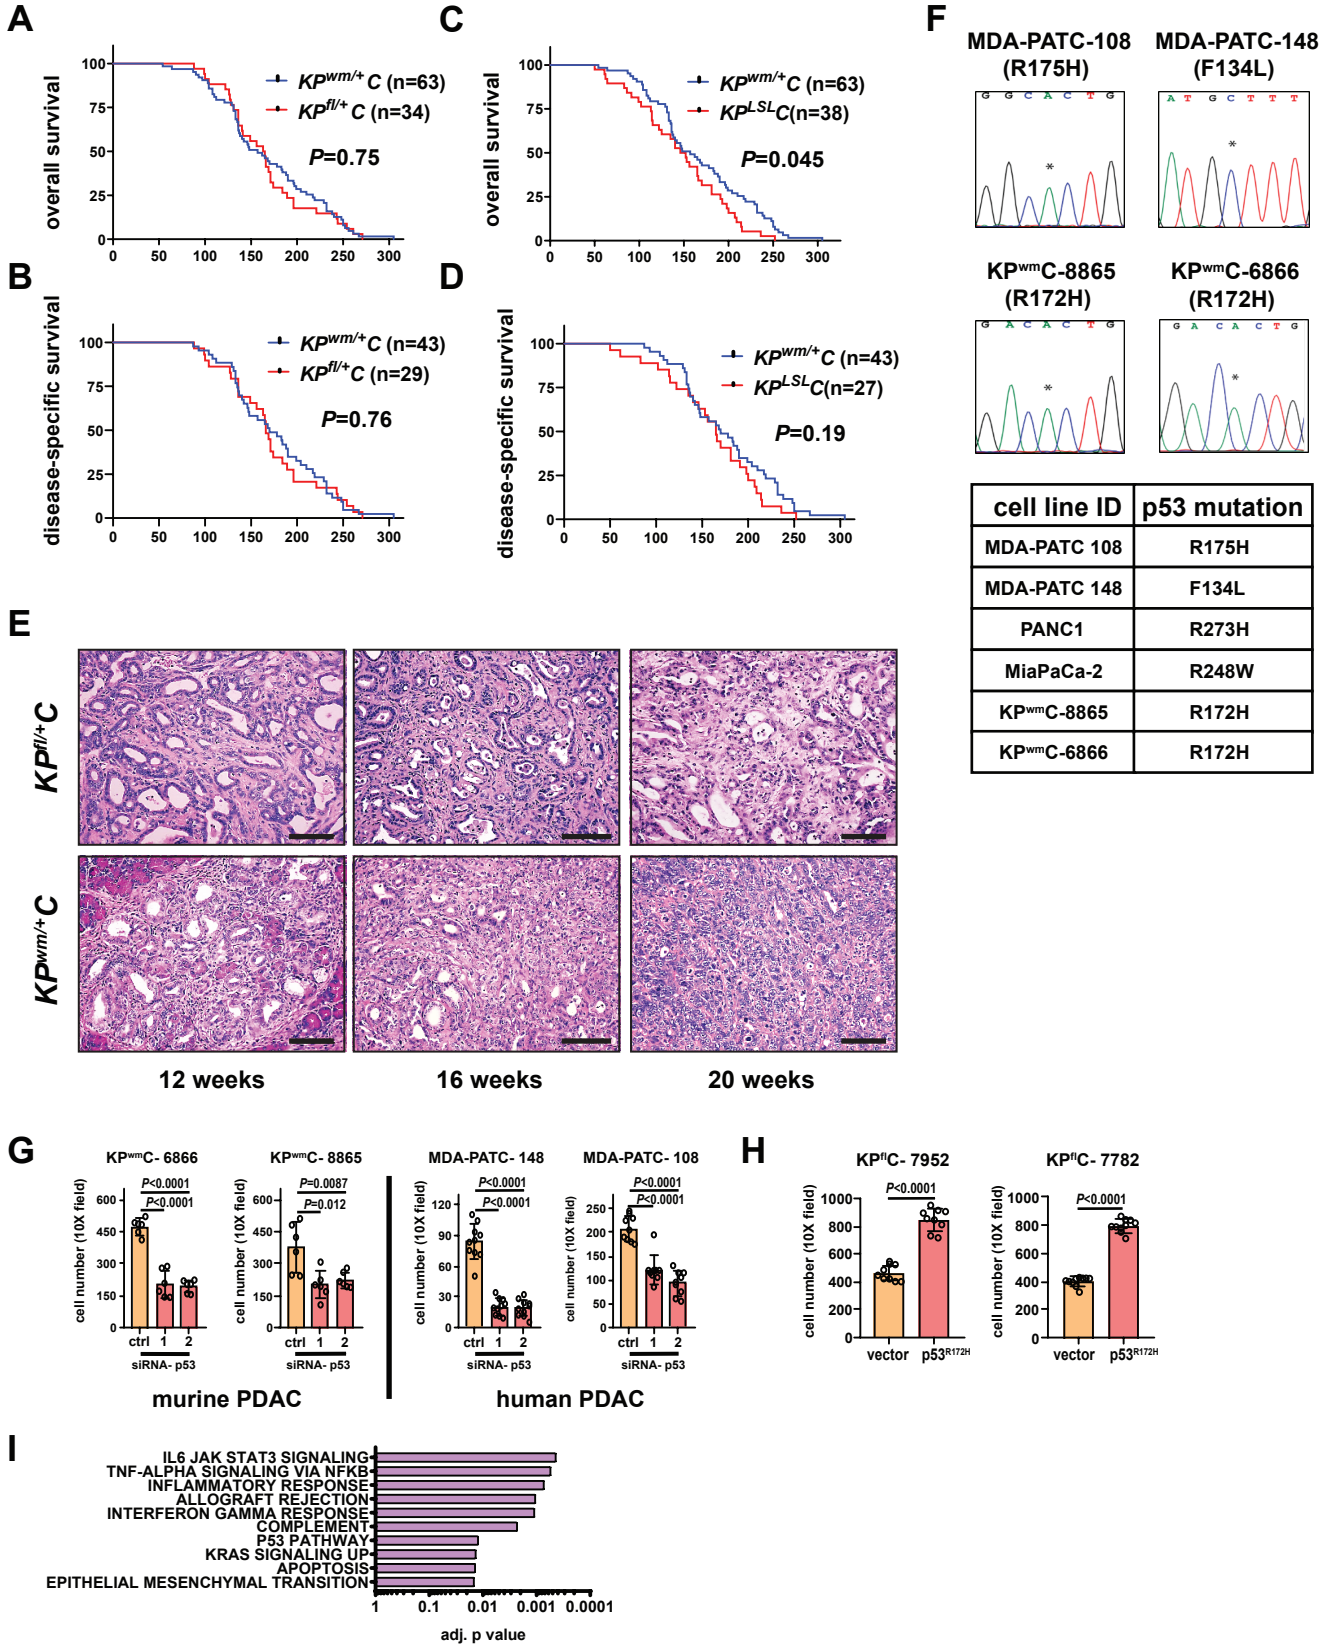

Supplementary Figure 1

**Supplementary Figure 1. Characterization of the  $KP^{wm/+}C$  mouse model and derived cell lines.** **A and B**, The overall survival and disease-specific survival between  $KP^{wm/+}C$  and  $KP^{fl/+}C$  PDAC models as determined by the log-rank (Mantel-Cox) test. **C and D**, The overall survival and disease-specific survival between  $KP^{wm/+}C$  and  $KP^{LSL/+}C$  PDAC models as determined by the log-rank (Mantel-Cox) test. **E**, The timeline of PDAC progression is histologically similar between  $KP^{wm/+}C$  and  $KP^{fl/+}C$  PDAC models. Scale bars, 200 $\mu$ M. **F**, All murine and human PDAC cell lines underwent Sanger sequencing to confirm *p53* missense mutations (listed) and to exclude the presence of wildtype *p53* alleles. **G**, Transwell migration/invasion assays of PDAC cell lines derived from pancreas tumors in  $KP^{wm/+}C$  mice and human PDAC cell lines (MDA-PATC) following mutant *p53* knockdown. **H**, The effects of ectopic mutant *p53*<sup>R172H</sup> expression on PDAC cell migration and invasion in *p53*-null,  $KP^{fl}C$  cell lines. **I**, GSEA analysis of hallmark pathways in  $KP^{wm/+}C$  tumors reveals dysregulated pathways similar to human PDAC. **(G, H)** Data are quantified by 20X fields as mean $\pm$ s.d. and pooled from at least two independent experiments performed in triplicate. P values determined by unpaired two-tailed t-tests.
