# Supplementary material
Source: PubMed Central journal article supplement (PMC8338884)
Supplement: NIHMS1690337-supplement-2.pdf [file NIHMS1690337-supplement-2.pdf]

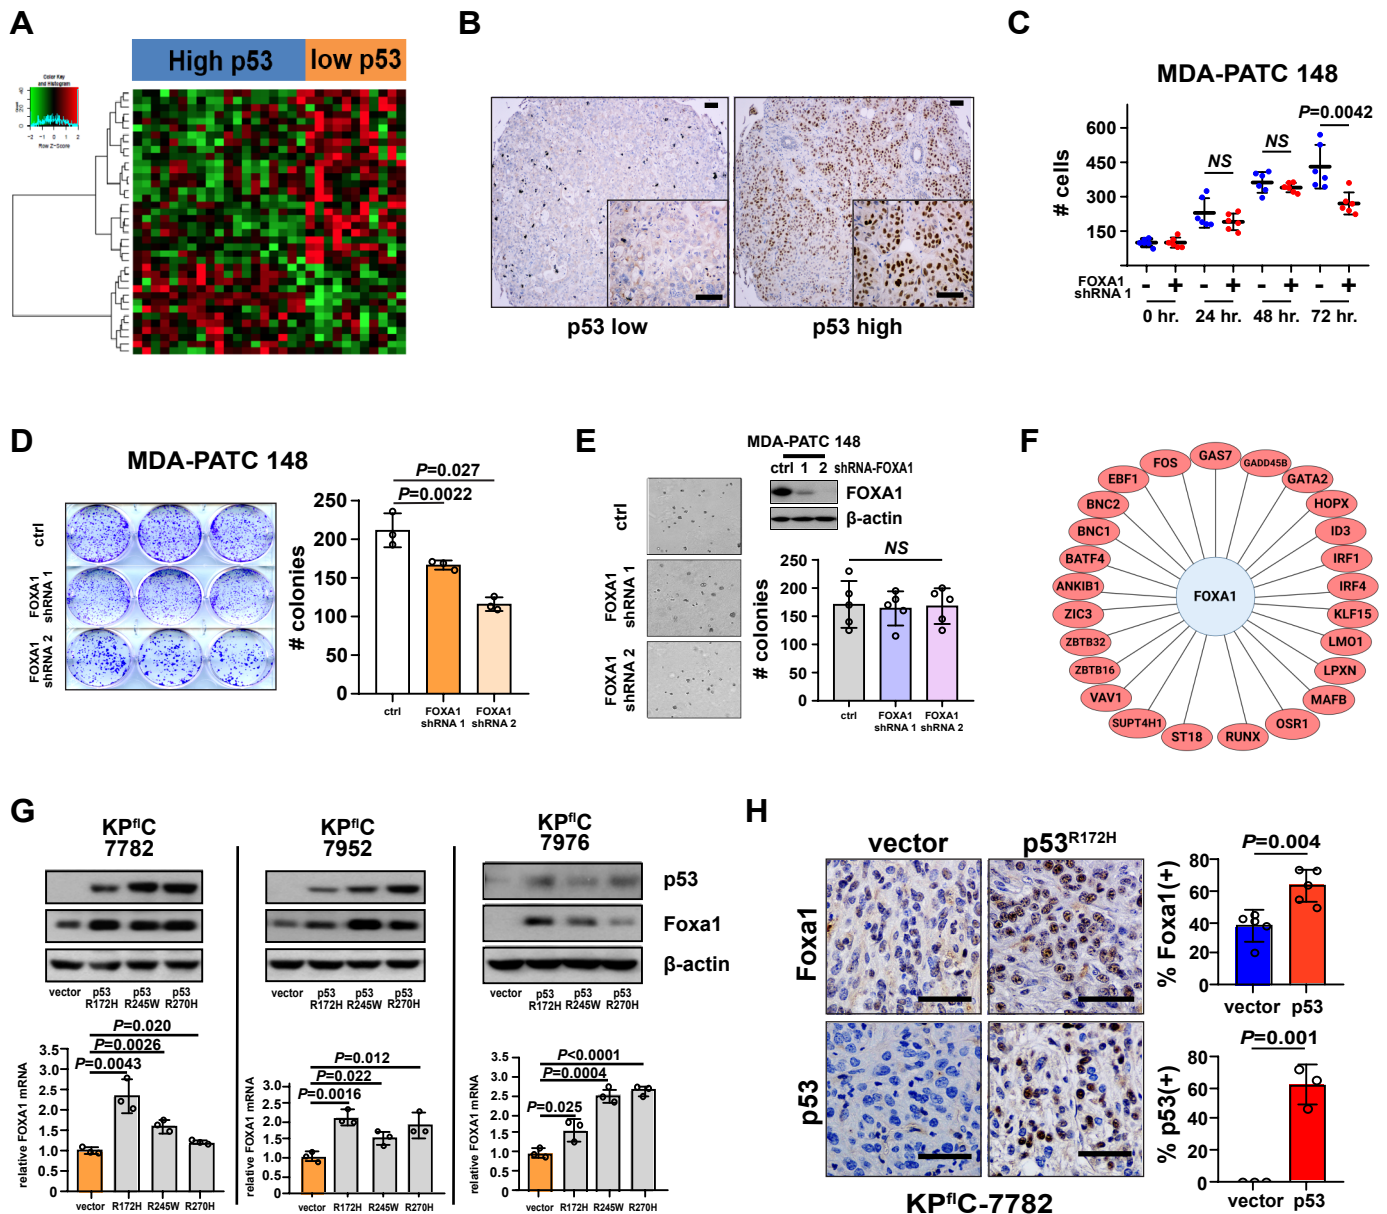

**Supplementary Figure 2. Mutant p53 regulates a *FOXA1* transcriptional signature.**  
**A**, Heatmap of differentially expressed genes between 11 p53<sup>low</sup> and 19 p53<sup>high</sup> PDAC tumors following RNA-sequencing. **B**, Representative p53<sup>low</sup> and p53<sup>high</sup> immunostaining in 30 unique patient derived xenografts (PDXs) generated from human PDAC tumors. *p53* missense mutations were confirmed in PDX tumors by whole exome sequencing. **C**, PDAC cell proliferation as measured by MTT assay in MDA-PATC 148 cells following *FOXA1* knockdown. **D**, Effect of *FOXA1* knockdown on anchorage-dependent growth and colony formation. **E**, Effect of *FOXA1* knockdown on anchorage-independent growth and colony formation. **F**, Transcription factors upregulated in *KP<sup>wm/+</sup>C* tumors that contain Foxa1 binding motifs within promoter regions. **G**, The effect of ectopic overexpression of three different p53 missense mutants on Foxa1 levels. **H**, *In vivo* expression of Foxa1 following mutant p53R172H overexpression in p53-null KP<sup>flC</sup> PDAC cells and xenotransplantation into nude mice.
