# Supplementary material
Source: PubMed Central journal article supplement (PMC8338884)
Supplement: NIHMS1690337-supplement-3.pdf [file NIHMS1690337-supplement-3.pdf]

**A**

**FOXA1 target genes**

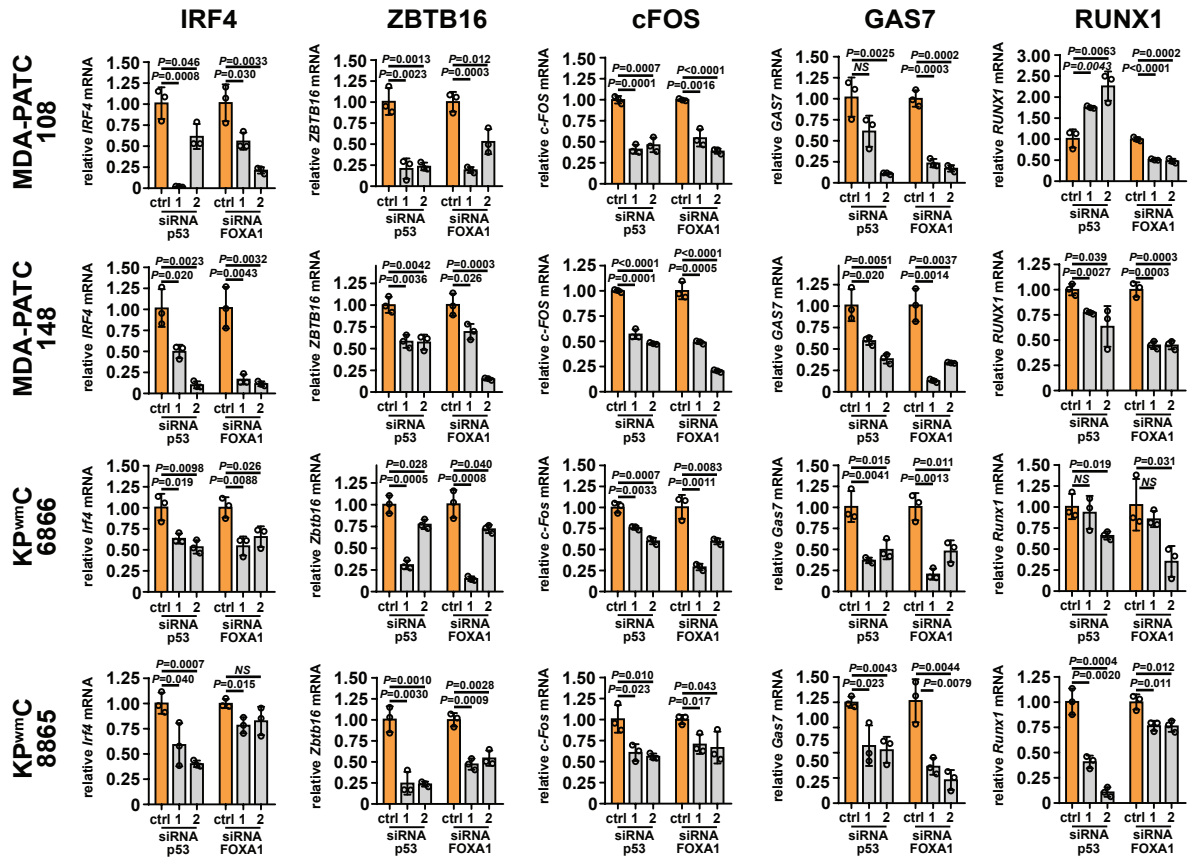

**B**

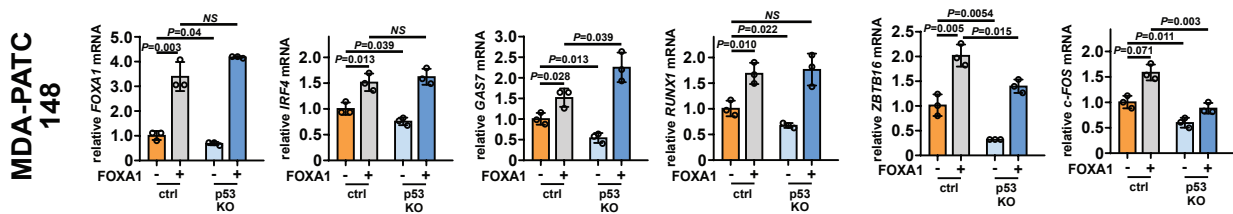

**C**

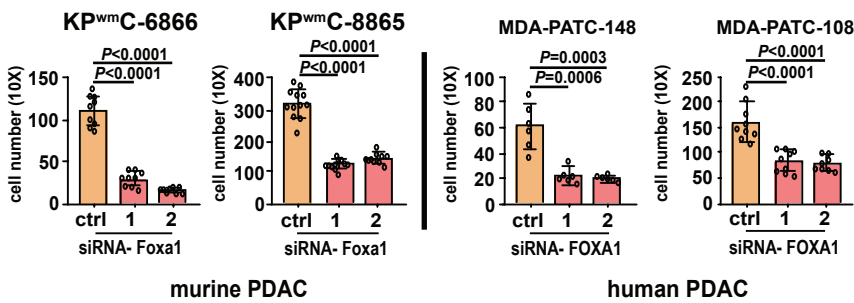

**D**

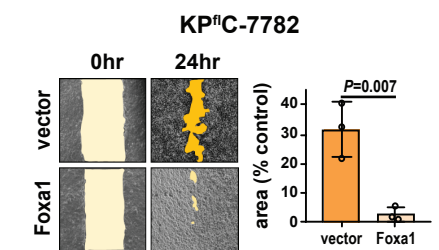

**Supplementary Figure 3**

**Supplementary Figure 3. Mutant p53 regulates PDAC cell migration/invasion through FOXA1.** **A**, Concordance of FOXA1 target gene expression following knockdown of mutant p53 or *FOXA1*. **B**, Effect of FOXA1 overexpression on FOXA1 target gene expression in the setting of endogenous levels of mutant p53 or following genetic knockout of mutant p53. **C**, The effect of FOXA1 knockdown on PDAC cell migration/invasion in murine and human PDAC. **D**, The effect of FOXA1 overexpression on PDAC cell migration as measured by scratch test assay.
