# Supplementary material
Source: PubMed Central journal article supplement (PMC8338884)
Supplement: NIHMS1690337-supplement-5.pdf [file NIHMS1690337-supplement-5.pdf]

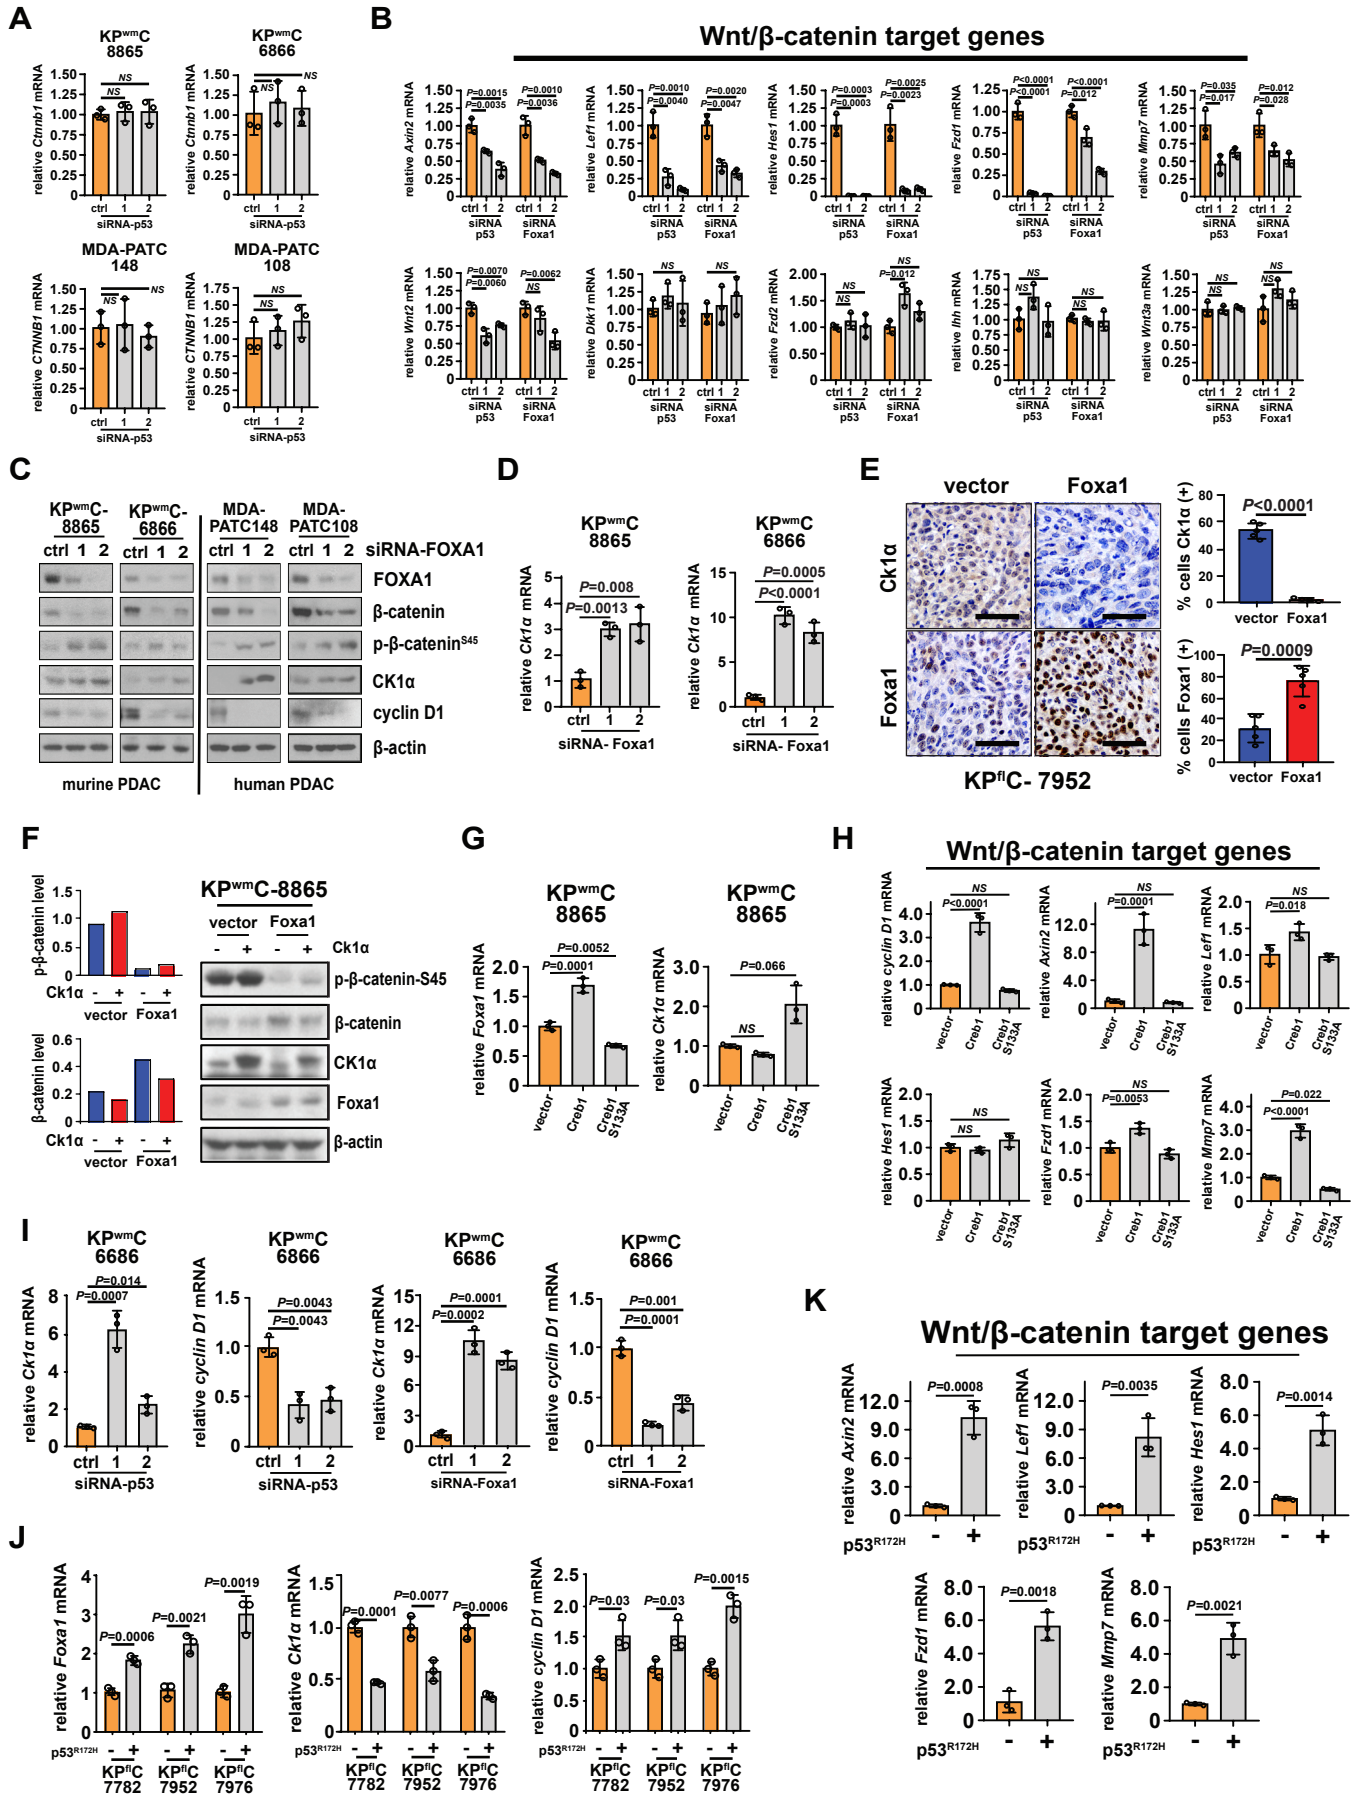

Supplementary Figure 5

**Supplementary Figure 5. FOXA1 promotes  $\beta$ -catenin stabilization and activity through downregulation of CK1 $\alpha$ .** **A**, The effect of mutant p53 knockdown on  *$\beta$ -catenin* expression. **B**, Concordance of Wnt/ $\beta$ -catenin target gene expression following knockdown of mutant p53 or *Foxa1*. **C**, p- $\beta$ -catenin<sup>S45</sup>, total  $\beta$ -catenin, CK1 $\alpha$  and cyclin D1 levels were measured by western blot following siRNA-mediated knockdown of *FOXA1* to assess for  $\beta$ -catenin degradation. **D**, The effect of siRNA-mediated *Foxa1* knockdown on *CK1 $\alpha$*  expression. **E**, The effect of *Foxa1* overexpression on CK1 $\alpha$ (+) nuclei *in vivo*. **F**, *Foxa1* was overexpressed in KP<sup>wm</sup>C cells, with and without wildtype CK1 $\alpha$ , and p- $\beta$ -catenin-S45,  $\beta$ -catenin and *Foxa1* levels were measured. **G**, The effect of wildtype *Creb1* or *Creb1*<sup>S133A</sup> mutant overexpression on *CK1 $\alpha$*  expression. **H**, The effect of wildtype *Creb1* or *Creb1*<sup>S133A</sup> mutant overexpression on Wnt/ $\beta$ -catenin target gene expression. **I**, The effect of mutant p53 or *Foxa1* knockdown on *CK1 $\alpha$*  and *cyclin D1* expression. **J**, *Foxa1*, *CK1 $\alpha$* , and *cyclin D1* expression following ectopic mutant p53R172H expression in three unique KP<sup>f</sup>C cells. **K**, The effect of mutant p53R172H expression on Wnt/ $\beta$ -catenin target gene expression.
